# Supplementary material
Source: HighWire-hosted journal article supplement (https://erj.ersjournals.com/content/56/6/2000441)
Supplement: inline-supplementary-material-1 [file inline-supplementary-material-1.pdf]

## **The assessment of short and long term changes in lung function in CF using $^{129}\text{Xe}$ MRI**

Authors: Laurie J. Smith<sup>1,2</sup>, Alex Horsley<sup>1,3</sup>, Jody Bray<sup>1</sup>, Paul J.C. Hughes<sup>1</sup>, Alberto Biancardi<sup>1</sup>, Graham Norquay<sup>1</sup>, Martin Wildman<sup>4</sup>, Noreen West<sup>2</sup>, Helen Marshall<sup>1</sup>, Jim M. Wild<sup>1</sup>

1, POLARIS, Imaging Sciences, Department of Infection Immunity and Cardiovascular Disease, University of Sheffield, Sheffield, UK

2, Sheffield Children's NHS Foundation Trust, Sheffield, UK

3, Respiratory Research Group, Division of Infection, Immunity & Respiratory Medicine, University of Manchester, Manchester, UK

4, Sheffield Teaching Hospitals NHS Foundation Trust, Sheffield, UK

Corresponding Author: Jim M. Wild. POLARIS, Imaging Sciences, Department of Infection, Immunity & Cardiovascular Disease, University of Sheffield, Sheffield, UK. Telephone: + 44 (0)114 2159141.

Email: [j.m.wild@sheffield.ac.uk](mailto:j.m.wild@sheffield.ac.uk)

## Online Supplementary Material

### Methods

$^{129}\text{Xe}$  ventilation MRI was performed on a 1.5T GE HDX MRI scanner (GE Milwaukee, USA). Images were acquired at a lung volume of end-inspiratory tidal volume as previously described, using titrated inhaled volumes of test gas (1). The test gas comprised of  $^{129}\text{Xe}$  and  $\text{N}_2$ . To achieve this end-inspiratory lung volume whilst in the scanner, patients were coached to initially breathe tidally by a trained operator. Once a stable breathing pattern was observed the test bag of gas was administered when the patient was at a lung volume of functional residual capacity. The volume of the test bag was titrated based on the standing height of the patient, details of which can be found in Table 1 below. 129-enriched (86%)  $^{129}\text{Xe}$  was hyperpolarised to  $\sim 30\%$ .(2)

**Table 1 - Inhaled bag volumes and the gas doses for  $^{129}\text{Xe}$  at each height range.**

| Patient Height   | Total Bag Volume | $^{129}\text{Xe}$ and $\text{N}_2$ Gas dose    |
|------------------|------------------|------------------------------------------------|
| <b>160cm +</b>   | 1.0 L            | 500 ml $^{129}\text{Xe}$ + 500 ml $\text{N}_2$ |
| <b>150-160cm</b> | 800 ml           | 450 ml $^{129}\text{Xe}$ + 350 ml $\text{N}_2$ |
| <b>140-150cm</b> | 650 ml           | 400 ml $^{129}\text{Xe}$ + 250 ml $\text{N}_2$ |
| <b>130-140cm</b> | 500 ml           | 350 ml $^{129}\text{Xe}$ + 150 ml $\text{N}_2$ |
| <b>120-130cm</b> | 400 ml           | 300 ml $^{129}\text{Xe}$ + 100 ml $\text{N}_2$ |

$^{129}\text{Xe}$  ventilation MRI was performed using a transmit-receive vest coil (Clinical MR Solutions, Brookfield, USA) and a 3D ventilation imaging sequences were used as described previously (3). For  $^{129}\text{Xe}$  acquisition: a bSSFP 3D sequence was used, with bandwidth = 16kHz, TE/TR = 2.2/6.7ms, flip angle =  $10^\circ$ .

In order to calculate the ventilation defect percentage (VDP) from  $^{129}\text{Xe}$  images, a separate  $^1\text{H}$  anatomical image was acquired in order to calculate the thoracic cavity volume.  $^1\text{H}$  images were acquired with the same breathing sequence as for  $^{129}\text{Xe}$  MRI, using a volume of air equivalent to the volume used for  $^{129}\text{Xe}$  MRI. For  $^{129}\text{Xe}$ , the  $^1\text{H}$  images were acquired during a separate breath-hold immediately prior to the  $^{129}\text{Xe}$  image. This then required an additional automated registration of the  $^1\text{H}$  images to the  $^{129}\text{Xe}$  images using MATLAB (Mathworks, Natick, MA) to get accurate alignment for image segmentation.

## References

1. Smith LJ, Collier GJ, Marshall H, Hughes PJC, Biancardi AM, Wildman M, et al. Patterns of regional lung physiology in cystic fibrosis using ventilation magnetic resonance imaging and multiple-breath washout. *European Respiratory Journal*. 2018;52(5).
2. Norquay G, Collier GJ, Rao M, Stewart NJ, Wild JM.  $^{129}\text{Xe}$ -Rb Spin-Exchange Optical Pumping with High Photon Efficiency. *Phys Rev Lett*. 2018;121(15):153201.
3. Stewart NJ, Chan HF, Hughes PJC, Horn FC, Norquay G, Rao M, et al. Comparison of  $(3)\text{He}$  and  $(129)\text{Xe}$  MRI for evaluation of lung microstructure and ventilation at 1.5T. *J Magn Reson Imaging*. 2018.
4. Wild JM, Ajraoui S, Deppe MH, Parnell SR, Marshall H, Parra-Robles J, et al. Synchronous acquisition of hyperpolarised  $^3\text{He}$  and  $^1\text{H}$  MR images of the lungs - maximising mutual anatomical and functional information. *NMR Biomed*. 2011;24(2):130-4.
