# Supplementary material
Source: HighWire-hosted journal article supplement (https://erj.ersjournals.com/content/56/6/2000441)
Supplement: inline-supplementary-material-2 [file inline-supplementary-material-2.pdf]

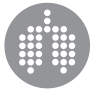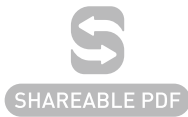

# The assessment of short- and long-term changes in lung function in cystic fibrosis using $^{129}\text{Xe}$ MRI

Laurie J. Smith <sup>1,2</sup>, Alex Horsley <sup>1,3</sup>, Jody Bray<sup>1</sup>, Paul J.C. Hughes <sup>1</sup>, Alberto Biancardi<sup>1</sup>, Graham Norquay<sup>1</sup>, Martin Wildman<sup>4</sup>, Noreen West<sup>2</sup>, Helen Marshall <sup>1</sup> and Jim M. Wild<sup>1</sup>

**Affiliations:** <sup>1</sup>POLARIS, Imaging Sciences, Dept of Infection, Immunity and Cardiovascular Disease, University of Sheffield, Sheffield, UK. <sup>2</sup>Sheffield Children's Hospital NHS Foundation Trust, Sheffield, UK. <sup>3</sup>Respiratory Research Group, Division of Infection, Immunity and Respiratory Medicine, University of Manchester, Manchester, UK. <sup>4</sup>Sheffield Teaching Hospitals NHS Foundation Trust, Sheffield, UK.

**Correspondence:** Jim M. Wild, POLARIS, Imaging Sciences, Department of Infection, Immunity and Cardiovascular Disease, University of Sheffield, Sheffield, UK. E-mail: j.m.wild@sheffield.ac.uk

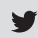

@ERSpublications

**$^{129}\text{Xe}$ -MRI in CF is highly repeatable. In patients with normal FEV<sub>1</sub>,  $^{129}\text{Xe}$ -MRI is also sensitive to detect changes in longitudinal lung function and should be highly informative in an era of CFTR modulators and increasingly preserved FEV<sub>1</sub>** <https://bit.ly/2C0D8Np>

**Cite this article as:** Smith LJ, Horsley A, Bray J, *et al.* The assessment of short- and long-term changes in lung function in cystic fibrosis using  $^{129}\text{Xe}$  MRI. *Eur Respir J* 2020; 56: 2000441 [<https://doi.org/10.1183/13993003.00441-2020>].

This single-page version can be shared freely online.

## ABSTRACT

**Introduction:** Xenon-129 ( $^{129}\text{Xe}$ ) ventilation magnetic resonance imaging (MRI) is sensitive to detect early cystic fibrosis (CF) lung disease and response to treatment.  $^{129}\text{Xe}$ -MRI could play a significant role in clinical trials and patient management. Here we present data on the repeatability of imaging measurements and their sensitivity to longitudinal change.

**Methods:** 29 children and adults with CF and a range of disease severity were assessed twice, a median (interquartile range (IQR)) of 16.0 (14.4–19.5) months apart. Patients underwent  $^{129}\text{Xe}$ -MRI, lung clearance index (LCI), body plethysmography and spirometry at both visits. 11 patients repeated  $^{129}\text{Xe}$ -MRI in the same session to assess the within-visit repeatability. The ventilation defect percentage (VDP) was the primary metric calculated from  $^{129}\text{Xe}$ -MRI.

**Results:** At baseline, mean $\pm$ SD age was 23.0 $\pm$ 11.1 years and forced expiratory volume in 1 s (FEV<sub>1</sub>) z-score was  $-2.2\pm 2.0$ . Median (IQR) VDP was 9.5 (3.4–31.6)% and LCI was 9.0 (7.7–13.7). Within- and inter-visit repeatability of VDP was high. At 16 months there was no single trend of  $^{129}\text{Xe}$ -MRI disease progression. Visible  $^{129}\text{Xe}$ -MRI ventilation changes were common, which reflected changes in VDP. Based on the within-visit repeatability, a significant short-term change in VDP is  $>\pm 1.6\%$ . For longer-term follow-up, changes in VDP of up to  $\pm 7.7\%$  can be expected, or  $\pm 4.1\%$  for patients with normal FEV<sub>1</sub>. No patient had a significant change in FEV<sub>1</sub>; however, 59% had change in VDP  $>\pm 1.6\%$ . In patients with normal FEV<sub>1</sub>, there were significant changes in ventilation and in VDP.

**Conclusions:**  $^{129}\text{Xe}$ -MRI is a highly effective method for assessing longitudinal lung disease in patients with CF. VDP has great potential as a sensitive clinical outcome measure of lung function and end-point for clinical trials.
